# Supplementary material for: Drug Repositioning for Fabry Disease: Acetylsalicylic Acid Potentiates the Stabilization of Lysosomal Alpha-Galactosidase by Pharmacological Chaperones
Source: MDPI journal article supplement (doi:10.3390/ijms23095105), 2022-05-04
Supplement: s1 [file s1]

Supplementary Table S1: Comparison of the AGAL activities measured in this paper and those available in Benjamin et al. 2017.

|              | This paper<br>nmol/(h mg) $\pm$ SD                                                     | Table 1S, Benjamin et al<br>nmol/(h mg) $\pm$ SEM | Seeman et al 2020<br>nmol/(h mg) $\pm$ SD |
|--------------|----------------------------------------------------------------------------------------|---------------------------------------------------|-------------------------------------------|
|              | Stable transfections in<br>patient-derived<br>fibroblasts not<br>expressing <i>GLA</i> | Transient transfections<br>in HEK-293 cells       | Patient-derived<br>fibroblasts            |
| Empty vector | 0.35 $\pm$ 0.02                                                                        | -                                                 | -                                         |
| wt           | 5.20 $\pm$ 0.01                                                                        | -                                                 | 58.5 $\pm$ 31.1                           |
| D244H        | 0.65 $\pm$ 0.04                                                                        | 6129 $\pm$ 366                                    | -                                         |
| Q280K        | 0.34 $\pm$ 0.03                                                                        | 8019 $\pm$ 395                                    | -                                         |
| V269M        | 0.39 $\pm$ 0.02                                                                        | 1213 $\pm$ 40                                     | -                                         |
| L300F        | 0.70 $\pm$ 0.07                                                                        | 4746 $\pm$ 363                                    | -                                         |
| C56Y         | 0.47 $\pm$ 0.02                                                                        | BLD *                                             | -                                         |
| E341D        | 0.34 $\pm$ 0.05                                                                        | BLD *                                             | -                                         |
| A230T        | 0.60 $\pm$ 0.02                                                                        | BLD *                                             | -                                         |

AGAL activities expressed as nmol/(h mg) from the independent experiments reported in this paper were averaged and compared to those reported in Benjamin et al. The results highlight that our cell lines do not overexpress AGAL. \* BLD: Below the limit of detection
